# Supplementary material
Source: PubMed Central journal article supplement (PMC5569620)
Supplement: Supp_Data.pdf [file Supp_Data.pdf]

# Cannabis and Pain Medication Substitution Questionnaire

## A. Demographic Information

A1. Gender: (circle one)

Cis male

Cis female

Trans male

Trans female

A2. Age:

A3. Race: (circle all that apply)

White, not Hispanic

Hispanic or Latino

African American, not Hispanic

Asian, not Hispanic

Pacific Islander, not Hispanic

Filipino, not Hispanic

American Indian or Alaska Native, not Hispanic

If other please specify \_\_\_\_\_

A4. What is the highest level of education you have completed? (Circle one)

Graduated from High School/GED

Some level of college

Graduated college

Completed graduate school

A5. What is the primary condition for which you use medical cannabis? (Circle one)

- ADD/ADHD
- Alzheimer's
- Anorexia
- Arthritis
- Asthma
- Anxiety
- Back Pain
- Bi-Polar
- Cancer
- Crohn's Disease
- Depression
- Diabetes
- Epilepsy
- Fibromyalgia
- HIV/AIDS
- Inflammation
- Insomnia
- Loss of Libido
- Loss of Appetite
- Menopause
- Menstrual Cramps/Pain
- Migraines
- Muscle Spasms
- Nausea
- Pain
- PTSD
- PMS
- Seizures
- Spasticity
- Tinnitus

Other \_\_\_\_\_

A6. How do you **usually** consume cannabis? (Circle one)

- Smoke
- Vaporize
- Edibles
- Tinctures
- Topicals

**B. Use of other medications besides cannabis for your medical condition**

B1. Are you currently, or within the past 6 months, taken Opiate pain medication (i.e., codeine, vicodin, oxycontin, etc.) for your medical condition?

Y/N (if no skips section C)

B2. Are you currently, or within the past 6 months, taken a non-opiate pain medication (i.e. Tylenol, Advil, Ibuprofen, etc.) for your medical condition?

Y/N (if no skips section D)

**C. Opiate Pain Medication Questions**

C1. Have you ever taken opiate pain medications together with cannabis?

Y/N (if no, skip to C3)

C2. When I use cannabis, I am able to decrease my opiate pain medication use.

Strongly agree

Agree

Disagree

Strongly disagree

C3. I have experienced side effects when taking my opiate medication by itself, such as sedation, dizziness, nausea, vomiting, or constipation.

Strongly Agree

Agree

Disagree

Strongly disagree

C4. Cannabis has more tolerable side effects, such as sedation or dizziness, than the opiate pain medication I am taking or have taken.

Strongly Agree

Agree

Disagree

Strongly disagree

C5. When I use cannabis by itself it is more effective for relieving pain than the opiate pain medications I am taking or have taken previously.

Strongly Agree

Agree

Disagree

Strongly disagree

C6. When I use cannabis by itself it produces the same pain relief as the opiate pain medications I am taking or have taken previously.

Strongly Agree

Agree

Disagree

Strongly disagree

C7. I prefer cannabis to the opiate pain medications I am taking or have previously taken.

Strongly Agree

Agree

Disagree

Strongly disagree

C8. If cannabis were more available (i.e., legalized, accepted, easier to access), I would use it in place of the opiate pain medications I am taking.

Strongly Agree

Agree

Disagree

Strongly Disagree

#### **D. Non-Opiate Pain Medication Questions**

D1. Have you ever taken non-opiate pain medications together with cannabis?

Y/N (If no, skip to D3)

D2. Cannabis works well with the non-opiate pain medications I am taking.

Strongly agree

Agree

Disagree

Strongly Disagree

D3. When I use cannabis, I don't need to use as much of my non-opiate pain medication (s).

Strongly agree

Agree

Disagree

Strongly Disagree

D4. Cannabis is more effective for relieving pain than the non-opiate pain medications I take or have previously taken.

Strongly Agree

Agree

Disagree

Strongly Disagree

D5. I prefer cannabis to the non-opiate pain medications I am taking or have previously taken.

Strongly Agree

Agree

Disagree

Strongly Disagree

D6. If cannabis were more available (i.e., legalized, accepted, easier to access), I would use it in place of the non-opiate pain medications I am taking.

Strongly Agree

Agree

Disagree

Strongly Disagree
